# Supplementary material
Source: PubMed Central journal article supplement (PMC7964673)
Supplement: 3336_table.pdf [file 3336_table.pdf]

**On-line Table: Demographic and imaging data**

| Patient No. | Sex, Age (yr) | Neurologic Symptoms (d)                                                                        | cMRI (d)        | Neuroimaging                                                                                                                                                                                                                                                                         |
|-------------|---------------|------------------------------------------------------------------------------------------------|-----------------|--------------------------------------------------------------------------------------------------------------------------------------------------------------------------------------------------------------------------------------------------------------------------------------|
| 1           | F, 61         | Generalized seizures, delirium (0)                                                             | 3 <sup>a</sup>  | MTL, insula: symmetric laminar SA with enhanced T2WI and DWI signal;<br>left amygdala: acute pointy diffusion restriction (low ADC value);<br>bithalamic irregular, mild patchy SA (DWI, T2);<br>pons: symmetric pointy SA (DWI, T2)                                                 |
|             |               | Status epilepticus, intravenous anesthesia with barbiturates with antiseizure effects          | 10              | Most severe signal changes:<br>MTL and insula: symmetric laminar SA and increased size of patchy ischemia in left amygdala (high signal on DWI and mildly increased in ADC);<br>lateral thalamus/PLIC: bilateral hyperintensity (DWI, T2);<br>pons: symmetric pointy SAs (T2, FLAIR) |
|             |               | Tracheotomy due to pneumonia, spontaneous breathing, fully awake but in mild confusional state | 45              | MTL and lateral thalamus: fading of SA (mild T2 hyperintensity, no DWI lesions);<br>left amygdala: decreased DWI signal, T2 shine through in ADC;<br>left dorsolateral thalamus: new hyperintensity (high DWI, low ADC);<br>pons: complete signal normalization                      |
| 2           | F, 42         | Aphasia, apraxia, memory deficits (2)                                                          | 0 <sup>a</sup>  | No certain SA                                                                                                                                                                                                                                                                        |
|             |               | Aphasia, apraxia, memory deficits                                                              | 4               | Symmetric pointy SAs in pons (T2, DWI);<br>thalamus: mild pointy bilateral SA (T2, DWI)                                                                                                                                                                                              |
| 3           | F, 59         | Complete neurologic recovery                                                                   | 17 <sup>a</sup> | Complete normalization of thalamic and pontine SA                                                                                                                                                                                                                                    |
|             |               | Delirium, memory deficits (3)                                                                  | 41 <sup>a</sup> | No SA in DWI and T2                                                                                                                                                                                                                                                                  |
| 3           | F, 59         | Complete neurologic recovery                                                                   | 5 <sup>a</sup>  | No signal changes                                                                                                                                                                                                                                                                    |
|             |               | Complete neurologic recovery                                                                   | 27              | Multiple pointy SAs in periventricular and juxtacortical white matter, mainly in bilateral frontal lobe, less frequently in parietal lobe (T2; not visible on DWI a/o ADC)                                                                                                           |
| 4           | F, 44         | Complete neurologic recovery                                                                   | 70              | Persistent pointy SAs in frontal and parietal white matter                                                                                                                                                                                                                           |
|             |               | Severe delirium, catatonia, panic agitation (3)                                                | 4               | Symmetric pointy SAs in pons (T2, not certain DWI)                                                                                                                                                                                                                                   |
| 4           | F, 44         | Nearly complete neurologic recovery, mild residual depression and lower performance level      | 59 <sup>a</sup> | Complete signal normalization                                                                                                                                                                                                                                                        |
|             |               | Hallucinations, psychotic confusional state (4)                                                | 5 <sup>a</sup>  | Symmetric pointy SAs in pons (T2, DWI)                                                                                                                                                                                                                                               |
| 5           | F, 50         | Complete neurologic recovery                                                                   | 102             | Complete normalization of pontine SA;<br>new cortical pointy SAs in left precentral gyrus                                                                                                                                                                                            |
|             |               | Mild aphasia, anxiety symptoms (2)                                                             | 28              | Pointy SAs in pons (on coronal T2)                                                                                                                                                                                                                                                   |
| 6           | F, 36         | Nearly complete neurologic recovery, residual lower performance level                          | 61 <sup>a</sup> | No definite SA                                                                                                                                                                                                                                                                       |
|             |               | Mild aphasia (2) anxiety symptoms                                                              | 1               | Left PLIC (only DWI)                                                                                                                                                                                                                                                                 |
| 7           | F, 50         | Complete neurologic recovery                                                                   | 54 <sup>a</sup> | Signal normalization                                                                                                                                                                                                                                                                 |
|             |               | Dysarthria, delirium, diplopia, visual impairment (5)                                          | 1 <sup>a</sup>  | Left thalamus/PLIC;<br>2 small pointy SAs in left cerebellum and 1 pointy SA in left parietal lobe (T2)                                                                                                                                                                              |
| 8           | F, 31         | Complete neurologic recovery                                                                   | 59 <sup>a</sup> | Cerebellar lesions not visible/normalized; left PLIC: SA improved, cortical SA in right parietal lobe persistent                                                                                                                                                                     |
|             |               | Aphasia, delirium, confusional state (2)                                                       | 5 <sup>a</sup>  | No signal changes                                                                                                                                                                                                                                                                    |
| 9           | F, 29         | No aphasia and delirium                                                                        | 20              | Subcortical patchy SA in right frontolateral lobe (T2) (DWI movement artifacts)                                                                                                                                                                                                      |
|             |               | Complete neurologic recovery                                                                   | 60 <sup>a</sup> | Signal normalization                                                                                                                                                                                                                                                                 |
| 10          | F, 62         | Seizures, delirium (7)                                                                         | 0               | No certain SA (movement artifacts of T2)                                                                                                                                                                                                                                             |
|             |               | Mental confusion                                                                               | 4 <sup>a</sup>  | No SA                                                                                                                                                                                                                                                                                |
| 10          | F, 62         | Complete neurologic recovery                                                                   | 71 <sup>a</sup> | No certain SA                                                                                                                                                                                                                                                                        |
|             |               | Memory deficits, anxiety symptoms (12)                                                         | 60 <sup>a</sup> | No SA                                                                                                                                                                                                                                                                                |

**Note:**—d indicates number of days after onset of neurologic symptoms at the time point cranial MRI; MTL, mesiotemporal lobe including the hippocampus and amygdala; PLIC, posterior limb of the internal capsule; PWM, periventricular white matter; SA, signal alteration; T2, T2-weighted imaging.

<sup>a</sup> Administration of MRI contrast agent gadolinium.
